# Supplementary figures and images for: The European and Japanese outbreaks of H5N8 derive from a single source population providing evidence for the dispersal along the long distance bird migratory flyways
Source: PeerJ journal article supplement (doi:10.7717/peerj.934), 2015-04-30

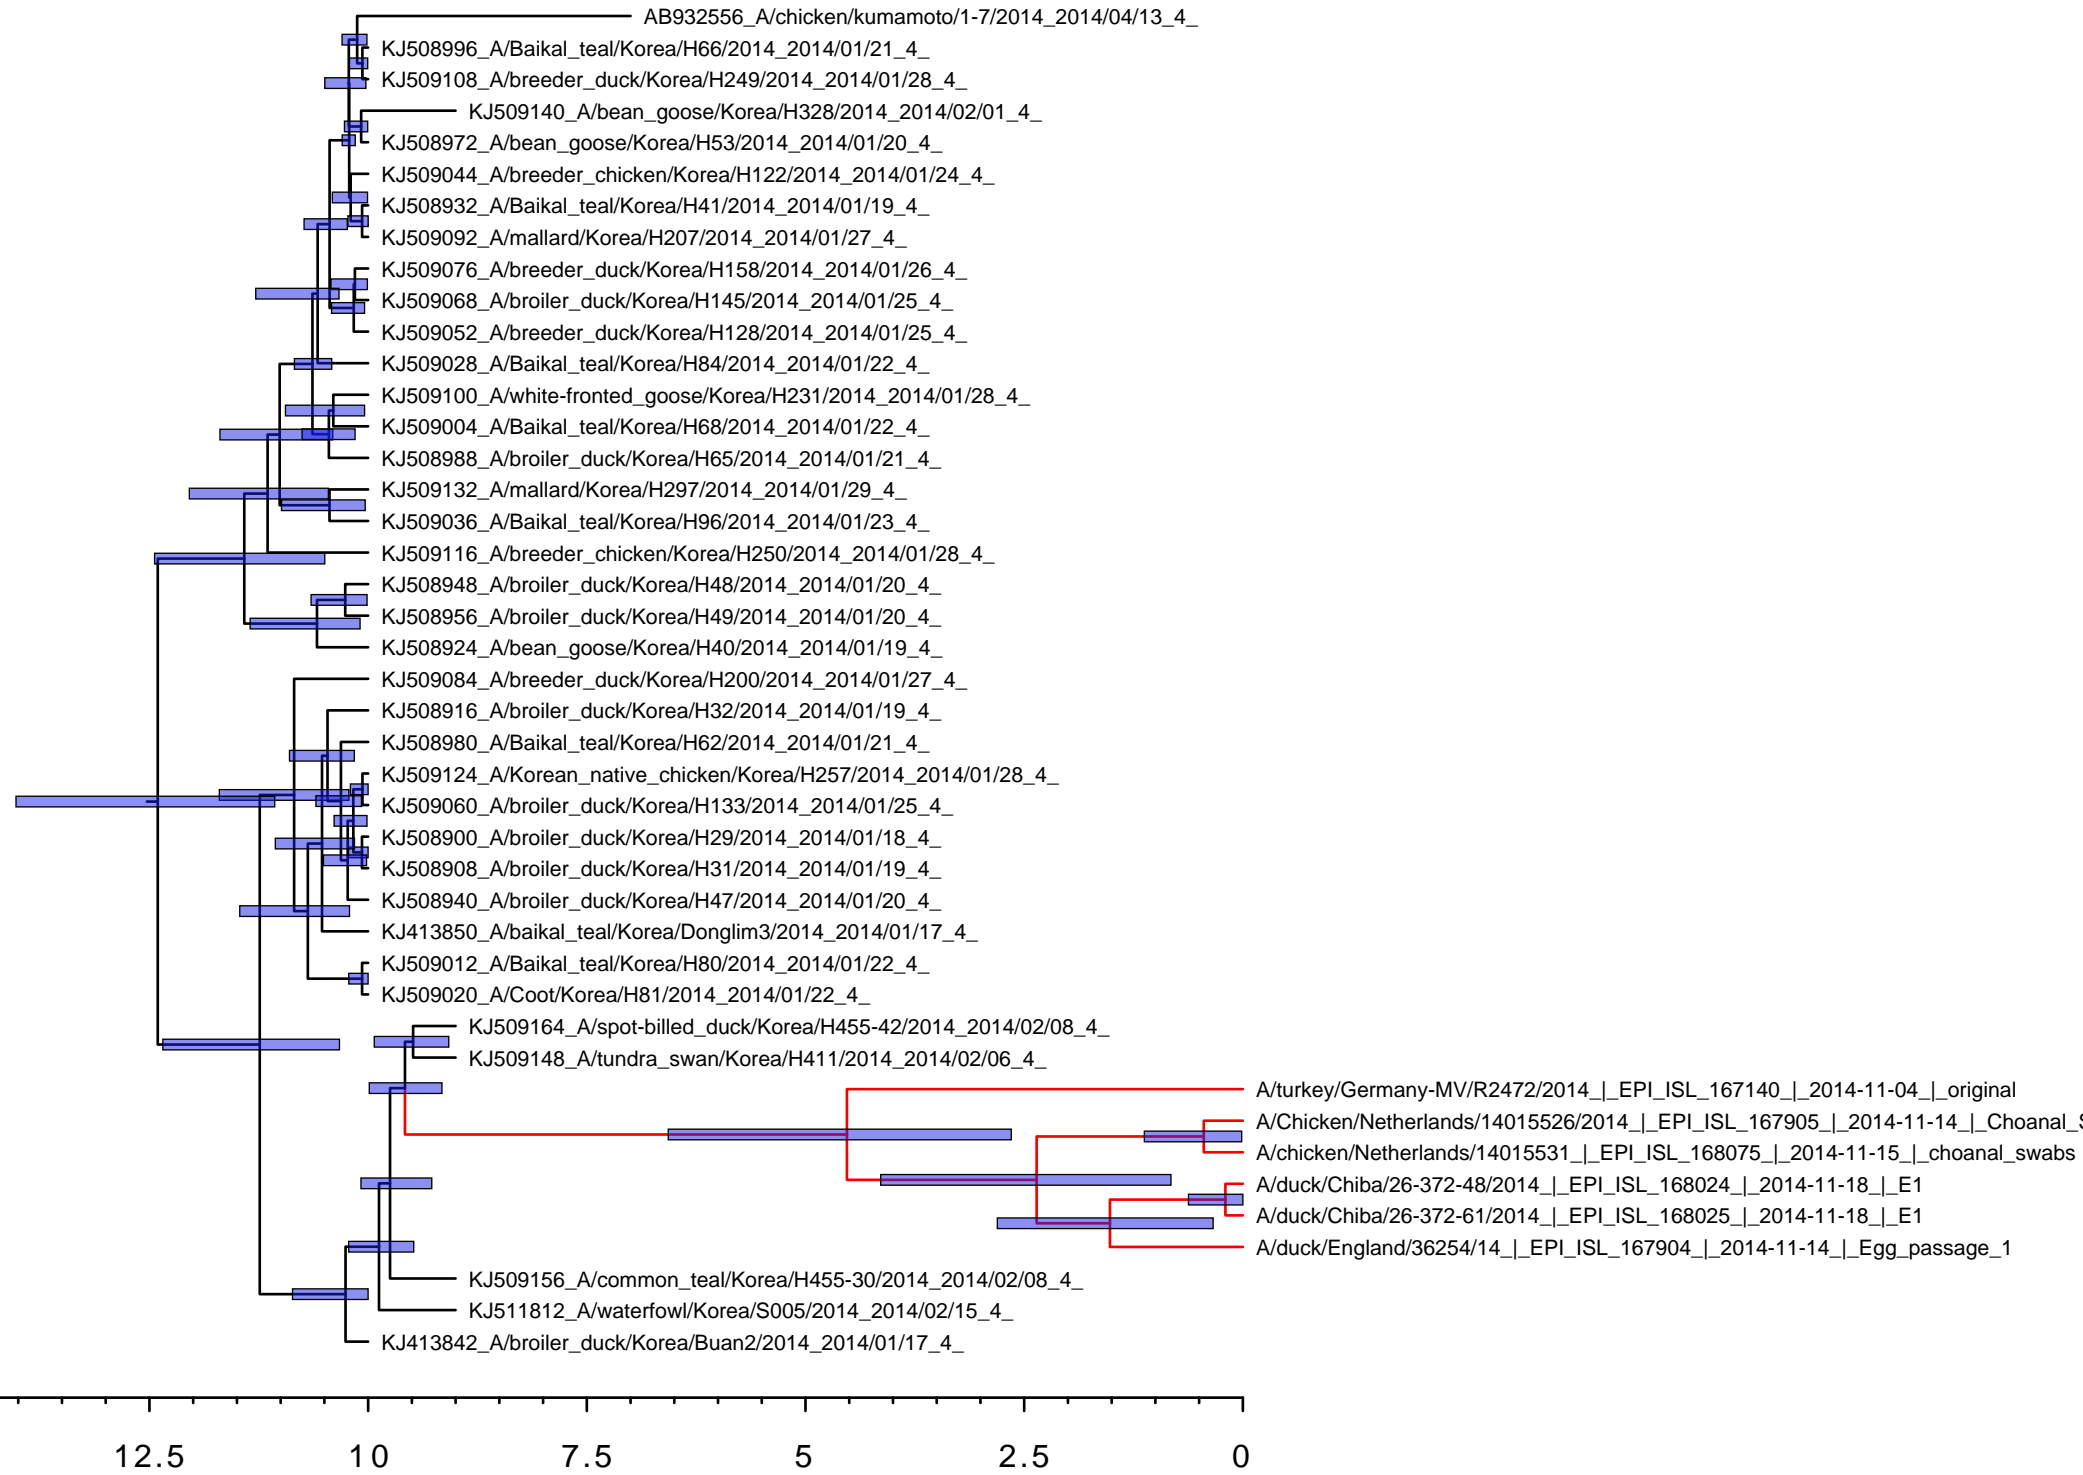

Supplement: H5N8_Analysis.zip [file H5N8_Analysis.zip]

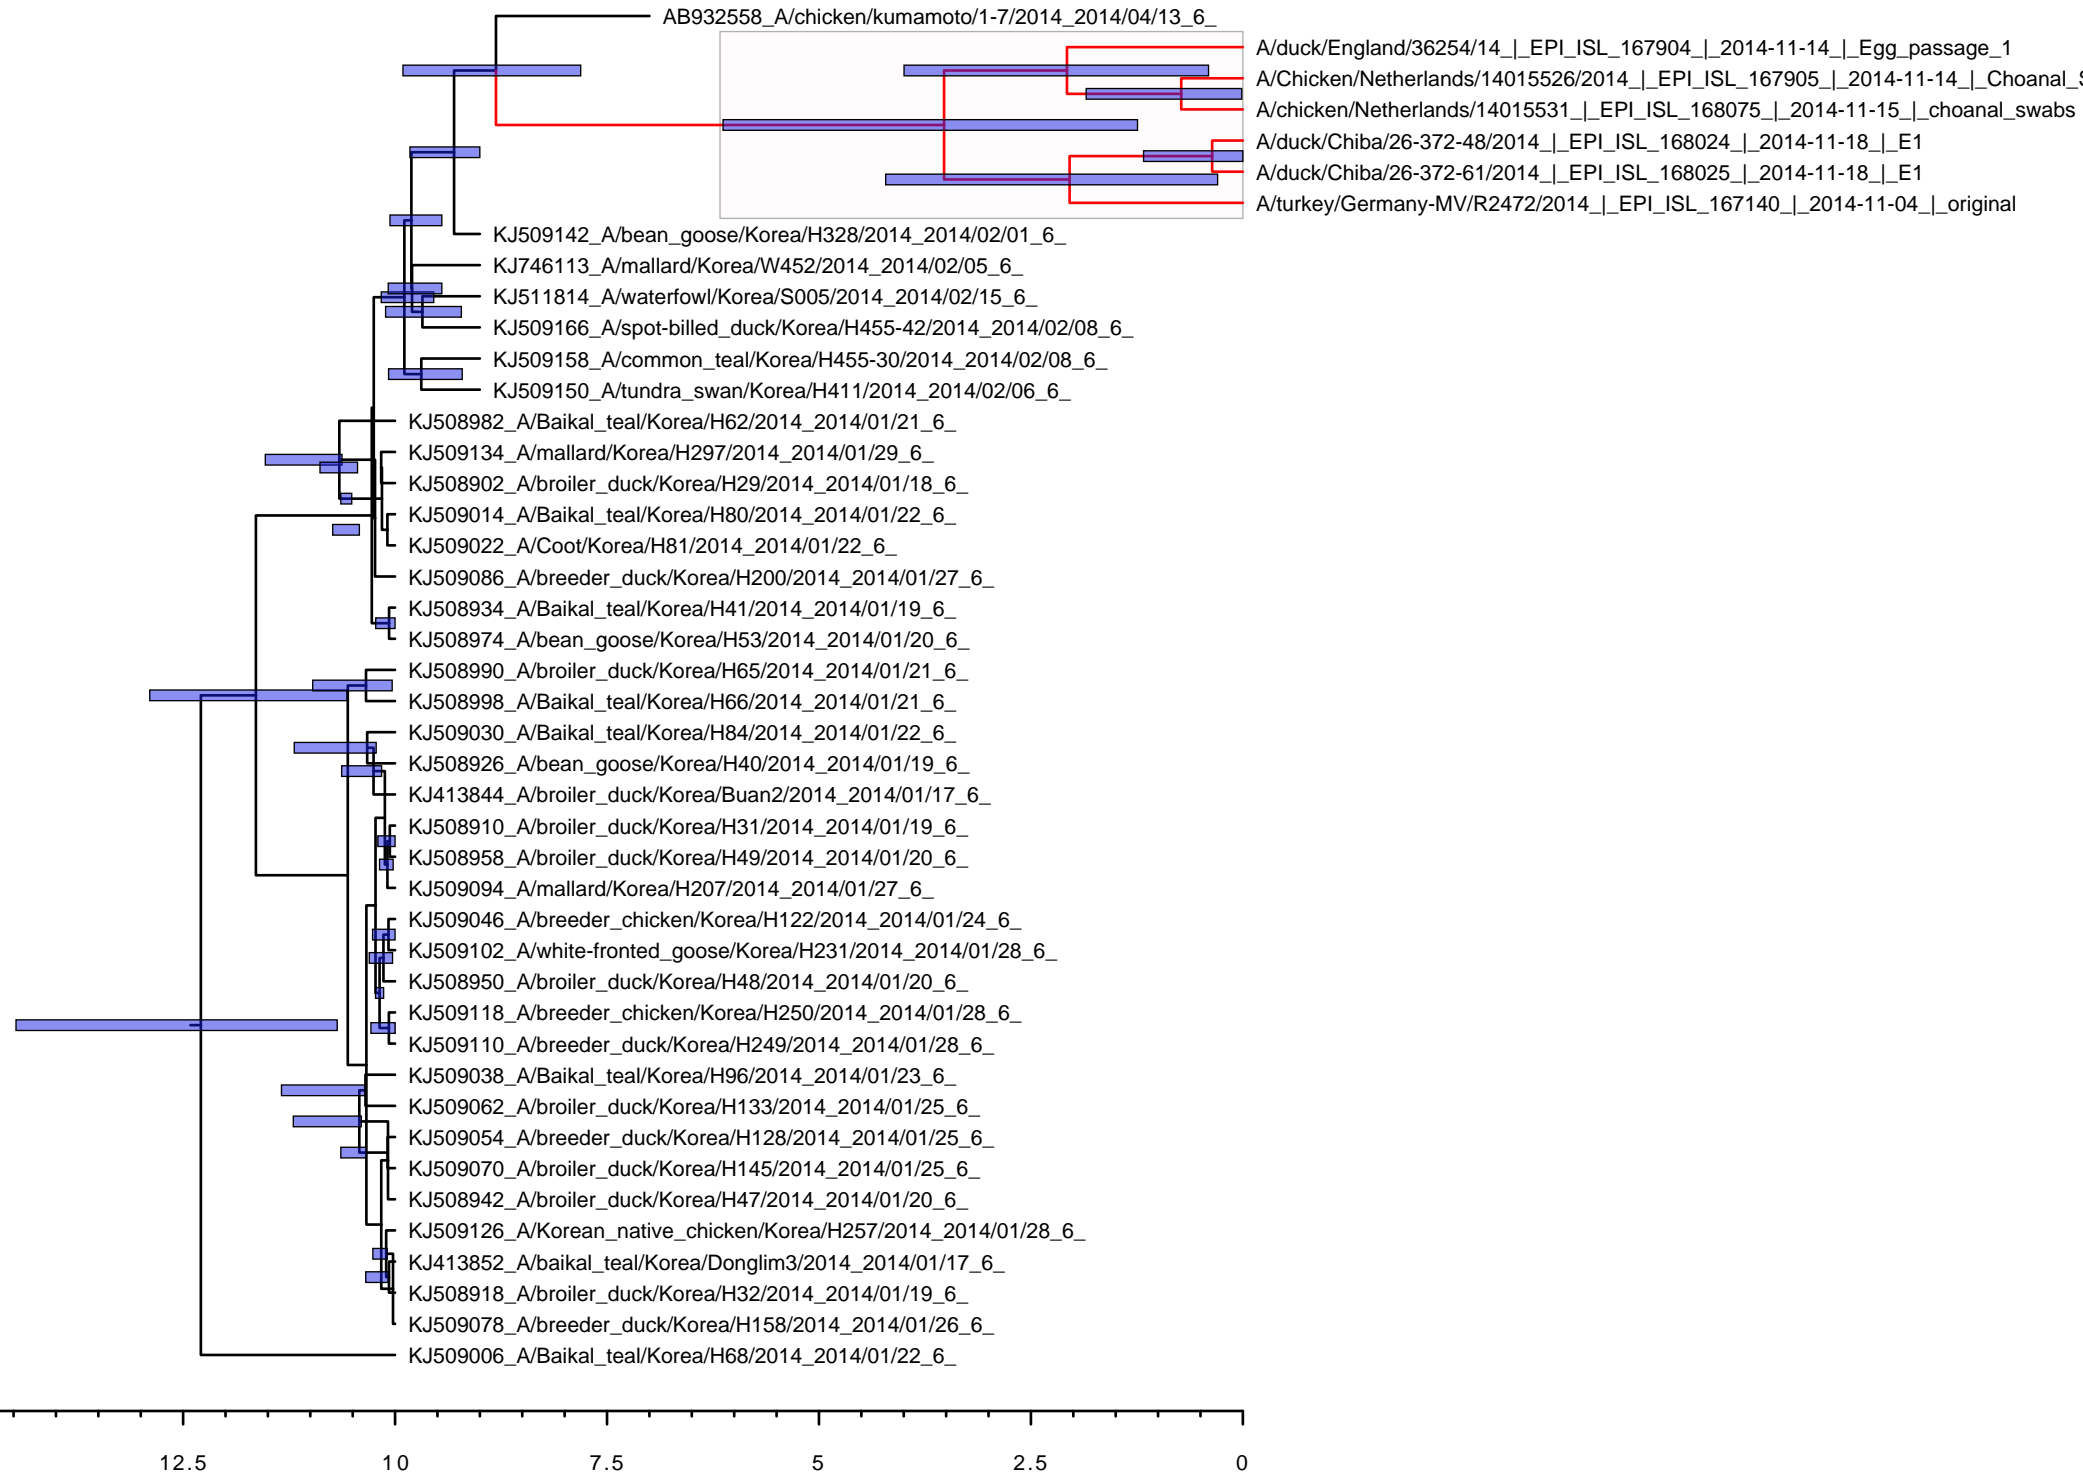

Supplement: H5N8_Analysis.zip [file H5N8_Analysis.zip]
